# Supplementary material for: Multimorbidity and mortality in Ontario, Canada: A population-based retrospective cohort study
Source: PubMed Central journal article supplement — J Comorb. 2020 Aug 27;10:2235042X20950598. doi: 10.1177/2235042X20950598 (PMC7457707; doi:10.1177/2235042x20950598), 2020-08-27
Supplement: Multimorbidity_and_mortality_Table_S1.pdf [file Multimorbidity_and_mortality_Table_S1.pdf]

**Table S1 - Chronic Conditions by Multimorbidity Status (3+ Chronic Conditions) by Age Group (Column %)**

| Age Group                     | ALL                         |                    |                     |              | 0 to 17 years               |                |                    |              |
|-------------------------------|-----------------------------|--------------------|---------------------|--------------|-----------------------------|----------------|--------------------|--------------|
|                               | Multimorbidity <sup>a</sup> |                    |                     |              | Multimorbidity <sup>a</sup> |                |                    |              |
|                               | No                          | Yes                | All                 | Overall Rank | No                          | Yes            | All                | Overall Rank |
| <b>Total N (% population)</b> | <b>N=11,514,013</b>         | <b>N=2,067,178</b> | <b>N=13,581,191</b> |              | <b>N=2,761,417</b>          | <b>N=5,040</b> | <b>N=2,766,457</b> |              |
| <b>Chronic Condition</b>      |                             |                    |                     |              |                             |                |                    |              |
| Arthritis                     | 434,700 (3.8%)              | 921,257 (44.6%)    | 1,355,957 (10.0%)   | 4            | 2,461 (0.1%)                | 264 (5.2%)     | 2,725 (0.1%)       | 10           |
| Asthma                        | 1,477,358 (12.8%)           | 568,241 (27.5%)    | 2,045,599 (15.1%)   | 3            | 513,889 (18.6%)             | 3,875 (76.9%)  | 517,764 (18.7%)    | 1            |
| Cancer                        | 324,338 (2.8%)              | 579,017 (28.0%)    | 903,355 (6.7%)      | 6            | 12,766 (0.5%)               | 1,417 (28.1%)  | 14,183 (0.5%)      | 4            |
| Congestive heart failure      | 13,181 (0.1%)               | 224,523 (10.9%)    | 237,704 (1.8%)      | 12           | 0                           | 0              | 0                  | 16           |
| COPD <sup>b</sup>             | 216,977 (1.9%)              | 602,014 (29.1%)    | 818,991 (6.0%)      | 7            | 0                           | 0              | 0                  | 17           |
| Cardiovascular disease        | 131,206 (1.1%)              | 570,652 (27.6%)    | 701,858 (5.2%)      | 8            | 4,600 (0.2%)                | 1,102 (21.9%)  | 5,702 (0.2%)       | 8            |
| Dementia                      | 16,150 (0.1%)               | 137,665 (6.7%)     | 153,815 (1.1%)      | 15           | 214 (0.0%)                  | 68 (1.3%)      | 282 (0.0%)         | 15           |
| Diabetes                      | 448,212 (3.9%)              | 821,056 (39.7%)    | 1,269,268 (9.3%)    | 5            | 7,278 (0.3%)                | 468 (9.3%)     | 7,746 (0.3%)       | 6            |
| HIV                           | 9,972 (0.1%)                | 7,212 (0.3%)       | 17,184 (0.1%)       | 17           | 962 (0.0%)                  | 57 (1.1%)      | 1,019 (0.0%)       | 14           |
| Hypertension                  | 1,258,109 (10.9%)           | 1,602,543 (77.5%)  | 2,860,652 (21.1%)   | 2            | 5,631 (0.2%)                | 1,821 (36.1%)  | 7,452 (0.3%)       | 7            |
| IBD <sup>b</sup>              | 42,922 (0.4%)               | 38,301 (1.9%)      | 81,223 (0.6%)       | 16           | 1,575 (0.1%)                | 185 (3.7%)     | 1,760 (0.1%)       | 13           |
| Kidney disease, chronic       | 21,959 (0.2%)               | 173,455 (8.4%)     | 195,414 (1.4%)      | 14           | 1,285 (0.0%)                | 714 (14.2%)    | 1,999 (0.1%)       | 12           |
| Liver disease, chronic        | 135,903 (1.2%)              | 142,571 (6.9%)     | 278,474 (2.1%)      | 11           | 8,611 (0.3%)                | 1,068 (21.2%)  | 9,679 (0.3%)       | 5            |
| Mood disorder                 | 2,430,479 (21.1%)           | 1,227,209 (59.4%)  | 3,657,688 (26.9%)   | 1            | 132,389 (4.8%)              | 3,012 (59.8%)  | 135,401 (4.9%)     | 2            |
| Osteoporosis                  | 118,319 (1.0%)              | 253,855 (12.3%)    | 372,174 (2.7%)      | 10           | 2,318 (0.1%)                | 353 (7.0%)     | 2,671 (0.1%)       | 11           |
| Stroke/TIA <sup>b</sup>       | 30,062 (0.3%)               | 169,453 (8.2%)     | 199,515 (1.5%)      | 13           | 2,637 (0.1%)                | 716 (14.2%)    | 3,353 (0.1%)       | 9            |
| Urinary incontinence          | 247,502 (2.1%)              | 349,416 (16.9%)    | 596,918 (4.4%)      | 9            | 20,583 (0.7%)               | 1,159 (23.0%)  | 21,742 (0.8%)      | 3            |

<sup>a</sup>Multimorbidity defined as 3 or more chronic conditions

<sup>b</sup> COPD-Chronic obstructive pulmonary disease; IBD-inflammatory bowel disease; TIA-Transient ischemic attack

NOTE: The top 3 rank is indicated in gray for overall and for each age group.

**Table S1 - Chronic Conditions by Multimorbidity Status (3+ Chronic Conditions) by Age Group (Column %) – Continued**

| Age Group                     | 18 to 24 years              |                 |                    |              | 25 to 29 years              |                 |                  |              |
|-------------------------------|-----------------------------|-----------------|--------------------|--------------|-----------------------------|-----------------|------------------|--------------|
|                               | Multimorbidity <sup>a</sup> |                 | All                | Overall Rank | Multimorbidity <sup>a</sup> |                 | All              | Overall Rank |
|                               | No                          | Yes             |                    |              | No                          | Yes             |                  |              |
| <b>Total N (% population)</b> | <b>N=1,240,740</b>          | <b>N=11,508</b> | <b>N=1,252,248</b> |              | <b>N=890,003</b>            | <b>N=14,438</b> | <b>N=904,441</b> |              |
| <b>Chronic Condition</b>      |                             |                 |                    |              |                             |                 |                  |              |
| Arthritis                     | 5,546 (0.4%)                | 1,335 (11.6%)   | 6,881 (0.5%)       | 8            | 6,432 (0.7%)                | 2,016 (14.0%)   | 8,448 (0.9%)     | 8            |
| Asthma                        | 303,534 (24.5%)             | 9,616 (83.6%)   | 313,150 (25.0%)    | 1            | 151,652 (17.0%)             | 10,811 (74.9%)  | 162,463 (18.0%)  | 2            |
| Cancer                        | 8,173 (0.7%)                | 1,807 (15.7%)   | 9,980 (0.8%)       | 5            | 8,435 (0.9%)                | 2,239 (15.5%)   | 10,674 (1.2%)    | 7            |
| Congestive heart failure      | 0                           | 0               | 0                  | 16           | 0                           | 0               | 0                | 16           |
| COPD <sup>b</sup>             | 0                           | 0               | 0                  | 17           | 0                           | 0               | 0                | 17           |
| Cardiovascular disease        | 3,066 (0.2%)                | 1,174 (10.2%)   | 4,240 (0.3%)       | 10           | 2,426 (0.3%)                | 1,132 (7.8%)    | 3,558 (0.4%)     | 10           |
| Dementia                      | 111 (0.0%)                  | 62 (0.5%)       | 173 (0.0%)         | 15           | 70 (0.0%)                   | 53 (0.4%)       | 123 (0.0%)       | 15           |
| Diabetes                      | 7,958 (0.6%)                | 1,828 (15.9%)   | 9,786 (0.8%)       | 6            | 8,749 (1.0%)                | 2,713 (18.8%)   | 11,462 (1.3%)    | 5            |
| HIV                           | 239 (0.0%)                  | 90 (0.8%)       | 329 (0.0%)         | 14           | 495 (0.1%)                  | 182 (1.3%)      | 677 (0.1%)       | 14           |
| Hypertension                  | 9,283 (0.7%)                | 2,836 (24.6%)   | 12,119 (1.0%)      | 4            | 14,664 (1.6%)               | 4,203 (29.1%)   | 18,867 (2.1%)    | 4            |
| IBD <sup>b</sup>              | 3,448 (0.3%)                | 802 (7.0%)      | 4,250 (0.3%)       | 9            | 3,774 (0.4%)                | 1,037 (7.2%)    | 4,811 (0.5%)     | 9            |
| Kidney disease, chronic       | 1,133 (0.1%)                | 874 (7.6%)      | 2,007 (0.2%)       | 11           | 1,099 (0.1%)                | 952 (6.6%)      | 2,051 (0.2%)     | 11           |
| Liver disease, chronic        | 7,443 (0.6%)                | 1,637 (14.2%)   | 9,080 (0.7%)       | 7            | 9,307 (1.0%)                | 2,102 (14.6%)   | 11,409 (1.3%)    | 6            |
| Mood disorder                 | 270,287 (21.8%)             | 10,256 (89.1%)  | 280,543 (22.4%)    | 2            | 243,477 (27.4%)             | 13,156 (91.1%)  | 256,633 (28.4%)  | 1            |
| Osteoporosis                  | 1,403 (0.1%)                | 473 (4.1%)      | 1,876 (0.1%)       | 12           | 886 (0.1%)                  | 470 (3.3%)      | 1,356 (0.1%)     | 13           |
| Stroke/TIA <sup>b</sup>       | 1,088 (0.1%)                | 602 (5.2%)      | 1,690 (0.1%)       | 13           | 1,007 (0.1%)                | 534 (3.7%)      | 1,541 (0.2%)     | 12           |
| Urinary incontinence          | 13,555 (1.1%)               | 2,992 (26.0%)   | 16,547 (1.3%)      | 3            | 17,415 (2.0%)               | 4,377 (30.3%)   | 21,792 (2.4%)    | 3            |

<sup>a</sup>Multimorbidity defined as 3 or more chronic conditions

<sup>b</sup> COPD-Chronic obstructive pulmonary disease; IBD-inflammatory bowel disease; TIA-Transient ischemic attack

NOTE: The top 3 rank is indicated in gray for overall and for each age group.

**Table S1 - Chronic Conditions by Multimorbidity Status (3+ Chronic Conditions) by Age Group (Column %) – Continued**

| Age Group                     | 30 to 34 years              |                 |                  |              | 35 to 39 years              |                 |                  |              |
|-------------------------------|-----------------------------|-----------------|------------------|--------------|-----------------------------|-----------------|------------------|--------------|
|                               | Multimorbidity <sup>a</sup> |                 | All              | Overall Rank | Multimorbidity <sup>a</sup> |                 | All              | Overall Rank |
|                               | No                          | Yes             |                  |              | No                          | Yes             |                  |              |
| <b>Total N (% population)</b> | <b>N=875,647</b>            | <b>N=21,481</b> | <b>N=897,128</b> |              | <b>N=857,366</b>            | <b>N=35,846</b> | <b>N=893,212</b> |              |
| <b>Chronic Condition</b>      |                             |                 |                  |              |                             |                 |                  |              |
| Arthritis                     | 9,990 (1.1%)                | 3,723 (17.3%)   | 13,713 (1.5%)    | 8            | 15,814 (1.8%)               | 7,405 (20.7%)   | 23,219 (2.6%)    | 6            |
| Asthma                        | 108,071 (12.3%)             | 14,123 (65.7%)  | 122,194 (13.6%)  | 2            | 87,401 (10.2%)              | 20,639 (57.6%)  | 108,040 (12.1%)  | 2            |
| Cancer                        | 11,678 (1.3%)               | 3,206 (14.9%)   | 14,884 (1.7%)    | 7            | 14,921 (1.7%)               | 4,979 (13.9%)   | 19,900 (2.2%)    | 8            |
| Congestive heart failure      | 0                           | 0               | 0                | 16           | 0                           | 0               | 0                | 17           |
| COPD <sup>b</sup>             | 0                           | 0               | 0                | 17           | 6,837 (0.8%)                | 3,654 (10.2%)   | 10,491 (1.2%)    | 9            |
| Cardiovascular disease        | 3,232 (0.4%)                | 1,849 (8.6%)    | 5,081 (0.6%)     | 10           | 4,475 (0.5%)                | 3,337 (9.3%)    | 7,812 (0.9%)     | 10           |
| Dementia                      | 93 (0.0%)                   | 98 (0.5%)       | 191 (0.0%)       | 15           | 122 (0.0%)                  | 120 (0.3%)      | 242 (0.0%)       | 16           |
| Diabetes                      | 14,468 (1.7%)               | 5,348 (24.9%)   | 19,816 (2.2%)    | 5            | 23,047 (2.7%)               | 10,546 (29.4%)  | 33,593 (3.8%)    | 4            |
| HIV                           | 898 (0.1%)                  | 297 (1.4%)      | 1,195 (0.1%)     | 14           | 1,178 (0.1%)                | 486 (1.4%)      | 1,664 (0.2%)     | 15           |
| Hypertension                  | 26,681 (3.0%)               | 8,138 (37.9%)   | 34,819 (3.9%)    | 3            | 45,433 (5.3%)               | 16,105 (44.9%)  | 61,538 (6.9%)    | 3            |
| IBD <sup>b</sup>              | 4,571 (0.5%)                | 1,354 (6.3%)    | 5,925 (0.7%)     | 9            | 5,186 (0.6%)                | 1,863 (5.2%)    | 7,049 (0.8%)     | 11           |
| Kidney disease, chronic       | 1,301 (0.1%)                | 1,319 (6.1%)    | 2,620 (0.3%)     | 11           | 1,597 (0.2%)                | 2,103 (5.9%)    | 3,700 (0.4%)     | 12           |
| Liver disease, chronic        | 12,736 (1.5%)               | 3,185 (14.8%)   | 15,921 (1.8%)    | 6            | 15,822 (1.8%)               | 4,966 (13.9%)   | 20,788 (2.3%)    | 7            |
| Mood disorder                 | 256,588 (29.3%)             | 19,459 (90.6%)  | 276,047 (30.8%)  | 1            | 264,941 (30.9%)             | 31,637 (88.3%)  | 296,578 (33.2%)  | 1            |
| Osteoporosis                  | 972 (0.1%)                  | 611 (2.8%)      | 1,583 (0.2%)     | 13           | 1,300 (0.2%)                | 860 (2.4%)      | 2,160 (0.2%)     | 14           |
| Stroke/TIA <sup>b</sup>       | 1,042 (0.1%)                | 699 (3.3%)      | 1,741 (0.2%)     | 12           | 1,246 (0.1%)                | 1,061 (3.0%)    | 2,307 (0.3%)     | 13           |
| Urinary incontinence          | 21,231 (2.4%)               | 6,100 (28.4%)   | 27,331 (3.0%)    | 4            | 23,491 (2.7%)               | 8,765 (24.5%)   | 32,256 (3.6%)    | 5            |

<sup>a</sup>Multimorbidity defined as 3 or more chronic conditions

<sup>b</sup> COPD-Chronic obstructive pulmonary disease; IBD-inflammatory bowel disease; TIA-Transient ischemic attack

NOTE: The top 3 rank is indicated in gray for overall and for each age group.

**Table S1 - Chronic Conditions by Multimorbidity Status (3+ Chronic Conditions) by Age Group (Column %) – Continued**

| Age Group                     | 40 to 44 years              |                 |                  |              | 45 to 49 years              |                  |                    |              |
|-------------------------------|-----------------------------|-----------------|------------------|--------------|-----------------------------|------------------|--------------------|--------------|
|                               | Multimorbidity <sup>a</sup> |                 | All              | Overall Rank | Multimorbidity <sup>a</sup> |                  | All                | Overall Rank |
|                               | No                          | Yes             |                  |              | No                          | Yes              |                    |              |
| <b>Total N (% population)</b> | <b>N=896,643</b>            | <b>N=62,278</b> | <b>N=958,921</b> |              | <b>N=931,182</b>            | <b>N=108,136</b> | <b>N=1,039,318</b> |              |
| <b>Chronic Condition</b>      |                             |                 |                  |              |                             |                  |                    |              |
| Arthritis                     | 26,181 (2.9%)               | 15,268 (24.5%)  | 41,449 (4.3%)    | 5            | 41,948 (4.5%)               | 32,103 (29.7%)   | 74,051 (7.1%)      | 5            |
| Asthma                        | 77,772 (8.7%)               | 30,264 (48.6%)  | 108,036 (11.3%)  | 3            | 73,531 (7.9%)               | 45,957 (42.5%)   | 119,488 (11.5%)    | 3            |
| Cancer                        | 20,132 (2.2%)               | 8,818 (14.2%)   | 28,950 (3.0%)    | 8            | 28,724 (3.1%)               | 16,451 (15.2%)   | 45,175 (4.3%)      | 8            |
| Congestive heart failure      | 365 (0.0%)                  | 1,136 (1.8%)    | 1,501 (0.2%)     | 16           | 842 (0.1%)                  | 3,269 (3.0%)     | 4,111 (0.4%)       | 15           |
| COPD <sup>b</sup>             | 17,916 (2.0%)               | 11,884 (19.1%)  | 29,800 (3.1%)    | 7            | 29,162 (3.1%)               | 26,390 (24.4%)   | 55,552 (5.3%)      | 6            |
| Cardiovascular disease        | 7,012 (0.8%)                | 7,063 (11.3%)   | 14,075 (1.5%)    | 10           | 11,120 (1.2%)               | 15,345 (14.2%)   | 26,465 (2.5%)      | 10           |
| Dementia                      | 161 (0.0%)                  | 227 (0.4%)      | 388 (0.0%)       | 17           | 235 (0.0%)                  | 495 (0.5%)       | 730 (0.1%)         | 17           |
| Diabetes                      | 35,683 (4.0%)               | 20,445 (32.8%)  | 56,128 (5.9%)    | 4            | 49,895 (5.4%)               | 37,731 (34.9%)   | 87,626 (8.4%)      | 4            |
| HIV                           | 1,578 (0.2%)                | 764 (1.2%)      | 2,342 (0.2%)     | 15           | 1,893 (0.2%)                | 1,378 (1.3%)     | 3,271 (0.3%)       | 16           |
| Hypertension                  | 78,370 (8.7%)               | 32,388 (52.0%)  | 110,758 (11.6%)  | 2            | 123,101 (13.2%)             | 63,197 (58.4%)   | 186,298 (17.9%)    | 2            |
| IBD <sup>b</sup>              | 5,645 (0.6%)                | 2,592 (4.2%)    | 8,237 (0.9%)     | 11           | 5,604 (0.6%)                | 3,549 (3.3%)     | 9,153 (0.9%)       | 11           |
| Kidney disease, chronic       | 1,983 (0.2%)                | 3,264 (5.2%)    | 5,247 (0.5%)     | 12           | 2,147 (0.2%)                | 5,273 (4.9%)     | 7,420 (0.7%)       | 12           |
| Liver disease, chronic        | 18,008 (2.0%)               | 7,817 (12.6%)   | 25,825 (2.7%)    | 9            | 18,269 (2.0%)               | 12,734 (11.8%)   | 31,003 (3.0%)      | 9            |
| Mood disorder                 | 278,513 (31.1%)             | 52,631 (84.5%)  | 331,144 (34.5%)  | 1            | 281,649 (30.2%)             | 87,142 (80.6%)   | 368,791 (35.5%)    | 1            |
| Osteoporosis                  | 1,892 (0.2%)                | 1,518 (2.4%)    | 3,410 (0.4%)     | 14           | 3,476 (0.4%)                | 3,205 (3.0%)     | 6,681 (0.6%)       | 13           |
| Stroke/TIA <sup>b</sup>       | 1,695 (0.2%)                | 1,967 (3.2%)    | 3,662 (0.4%)     | 13           | 2,420 (0.3%)                | 4,078 (3.8%)     | 6,498 (0.6%)       | 14           |
| Urinary incontinence          | 27,039 (3.0%)               | 13,456 (21.6%)  | 40,495 (4.2%)    | 6            | 29,469 (3.2%)               | 21,108 (19.5%)   | 50,577 (4.9%)      | 7            |

<sup>a</sup>Multimorbidity defined as 3 or more chronic conditions

<sup>b</sup> COPD-Chronic obstructive pulmonary disease; IBD-inflammatory bowel disease; TIA-Transient ischemic attack

NOTE: The top 3 rank is indicated in gray for overall and for each age group.

**Table S1 - Chronic Conditions by Multimorbidity Status (3+ Chronic Conditions) by Age Group (Column %) – Continued**

| Age Group                     | 50 to 54 years              |                  |                    |              | 55 to 59 years              |                  |                  |              |
|-------------------------------|-----------------------------|------------------|--------------------|--------------|-----------------------------|------------------|------------------|--------------|
|                               | Multimorbidity <sup>a</sup> |                  | All                | Overall Rank | Multimorbidity <sup>a</sup> |                  | All              | Overall Rank |
|                               | No                          | Yes              |                    |              | No                          | Yes              |                  |              |
| <b>Total N (% population)</b> | <b>N=903,786</b>            | <b>N=170,272</b> | <b>N=1,074,058</b> |              | <b>N=719,208</b>            | <b>N=220,251</b> | <b>N=939,459</b> |              |
| <b>Chronic Condition</b>      |                             |                  |                    |              |                             |                  |                  |              |
| Arthritis                     | 60,089 (6.6%)               | 60,152 (35.3%)   | 120,241 (11.2%)    | 5            | 67,706 (9.4%)               | 89,356 (40.6%)   | 157,062 (16.7%)  | 3            |
| Asthma                        | 63,727 (7.1%)               | 62,440 (36.7%)   | 126,167 (11.7%)    | 3            | 41,351 (5.7%)               | 67,938 (30.8%)   | 109,289 (11.6%)  | 5            |
| Cancer                        | 39,271 (4.3%)               | 30,233 (17.8%)   | 69,504 (6.5%)      | 7            | 41,498 (5.8%)               | 45,318 (20.6%)   | 86,816 (9.2%)    | 7            |
| Congestive heart failure      | 1,425 (0.2%)                | 6,904 (4.1%)     | 8,329 (0.8%)       | 15           | 1,733 (0.2%)                | 11,711 (5.3%)    | 13,444 (1.4%)    | 13           |
| COPD <sup>b</sup>             | 39,578 (4.4%)               | 48,505 (28.5%)   | 88,083 (8.2%)      | 6            | 38,592 (5.4%)               | 65,973 (30.0%)   | 104,565 (11.1%)  | 6            |
| Cardiovascular disease        | 15,875 (1.8%)               | 29,262 (17.2%)   | 45,137 (4.2%)      | 9            | 17,910 (2.5%)               | 44,392 (20.2%)   | 62,302 (6.6%)    | 8            |
| Dementia                      | 404 (0.0%)                  | 975 (0.6%)       | 1,379 (0.1%)       | 17           | 536 (0.1%)                  | 1,667 (0.8%)     | 2,203 (0.2%)     | 16           |
| Diabetes                      | 61,570 (6.8%)               | 62,320 (36.6%)   | 123,890 (11.5%)    | 4            | 62,578 (8.7%)               | 86,180 (39.1%)   | 148,758 (15.8%)  | 4            |
| HIV                           | 1,434 (0.2%)                | 1,399 (0.8%)     | 2,833 (0.3%)       | 16           | 704 (0.1%)                  | 1,029 (0.5%)     | 1,733 (0.2%)     | 17           |
| Hypertension                  | 166,937 (18.5%)             | 109,198 (64.1%)  | 276,135 (25.7%)    | 2            | 179,027 (24.9%)             | 154,871 (70.3%)  | 333,898 (35.5%)  | 2            |
| IBD <sup>b</sup>              | 5,006 (0.6%)                | 4,474 (2.6%)     | 9,480 (0.9%)       | 14           | 3,551 (0.5%)                | 4,739 (2.2%)     | 8,290 (0.9%)     | 15           |
| Kidney disease, chronic       | 2,252 (0.2%)                | 8,025 (4.7%)     | 10,277 (1.0%)      | 13           | 2,009 (0.3%)                | 10,857 (4.9%)    | 12,866 (1.4%)    | 14           |
| Liver disease, chronic        | 17,062 (1.9%)               | 18,034 (10.6%)   | 35,096 (3.3%)      | 10           | 13,107 (1.8%)               | 21,531 (9.8%)    | 34,638 (3.7%)    | 11           |
| Mood disorder                 | 259,020 (28.7%)             | 128,876 (75.7%)  | 387,896 (36.1%)    | 1            | 188,387 (26.2%)             | 153,735 (69.8%)  | 342,122 (36.4%)  | 1            |
| Osteoporosis                  | 8,334 (0.9%)                | 7,879 (4.6%)     | 16,213 (1.5%)      | 11           | 17,885 (2.5%)               | 18,049 (8.2%)    | 35,934 (3.8%)    | 10           |
| Stroke/TIA <sup>b</sup>       | 3,108 (0.3%)                | 7,185 (4.2%)     | 10,293 (1.0%)      | 12           | 3,229 (0.4%)                | 10,809 (4.9%)    | 14,038 (1.5%)    | 12           |
| Urinary incontinence          | 28,516 (3.2%)               | 29,442 (17.3%)   | 57,958 (5.4%)      | 8            | 22,005 (3.1%)               | 34,354 (15.6%)   | 56,359 (6.0%)    | 9            |

<sup>a</sup>Multimorbidity defined as 3 or more chronic conditions

<sup>b</sup> COPD-Chronic obstructive pulmonary disease; IBD-inflammatory bowel disease; TIA-Transient ischemic attack

NOTE: The top 3 rank is indicated in gray for overall and for each age group.

**Table S1 - Chronic Conditions by Multimorbidity Status (3+ Chronic Conditions) by Age Group (Column %) – Continued**

| Age Group                     | 60 to 64 years              |                  |                  |              | 65 to 69 years              |                  |                  |              |
|-------------------------------|-----------------------------|------------------|------------------|--------------|-----------------------------|------------------|------------------|--------------|
|                               | Multimorbidity <sup>a</sup> |                  | All              | Overall Rank | Multimorbidity <sup>a</sup> |                  | All              | Overall Rank |
|                               | No                          | Yes              |                  |              | No                          | Yes              |                  |              |
| <b>Total N (% population)</b> | <b>N=535,150</b>            | <b>N=256,004</b> | <b>N=791,154</b> |              | <b>N=383,110</b>            | <b>N=275,290</b> | <b>N=658,400</b> |              |
| <b>Chronic Condition</b>      |                             |                  |                  |              |                             |                  |                  |              |
| Arthritis                     | 62,346 (11.7%)              | 112,934 (44.1%)  | 175,280 (22.2%)  | 3            | 51,831 (13.5%)              | 128,561 (46.7%)  | 180,392 (27.4%)  | 3            |
| Asthma                        | 26,021 (4.9%)               | 67,799 (26.5%)   | 93,820 (11.9%)   | 7            | 15,642 (4.1%)               | 64,770 (23.5%)   | 80,412 (12.2%)   | 8            |
| Cancer                        | 39,917 (7.5%)               | 62,853 (24.6%)   | 102,770 (13.0%)  | 6            | 37,349 (9.7%)               | 81,512 (29.6%)   | 118,861 (18.1%)  | 5            |
| Congestive heart failure      | 1,867 (0.3%)                | 17,749 (6.9%)    | 19,616 (2.5%)    | 12           | 1,780 (0.5%)                | 24,158 (8.8%)    | 25,938 (3.9%)    | 11           |
| COPD <sup>b</sup>             | 30,142 (5.6%)               | 74,913 (29.3%)   | 105,055 (13.3%)  | 5            | 22,505 (5.9%)               | 81,998 (29.8%)   | 104,503 (15.9%)  | 6            |
| Cardiovascular disease        | 17,592 (3.3%)               | 61,332 (24.0%)   | 78,924 (10.0%)   | 8            | 16,121 (4.2%)               | 76,708 (27.9%)   | 92,829 (14.1%)   | 7            |
| Dementia                      | 586 (0.1%)                  | 2,836 (1.1%)     | 3,422 (0.4%)     | 16           | 1,062 (0.3%)                | 5,934 (2.2%)     | 6,996 (1.1%)     | 15           |
| Diabetes                      | 57,895 (10.8%)              | 107,766 (42.1%)  | 165,661 (20.9%)  | 4            | 48,725 (12.7%)              | 120,888 (43.9%)  | 169,613 (25.8%)  | 4            |
| HIV                           | 344 (0.1%)                  | 666 (0.3%)       | 1,010 (0.1%)     | 17           | 167 (0.0%)                  | 414 (0.2%)       | 581 (0.1%)       | 17           |
| Hypertension                  | 173,094 (32.3%)             | 195,503 (76.4%)  | 368,597 (46.6%)  | 1            | 155,156 (40.5%)             | 224,782 (81.7%)  | 379,938 (57.7%)  | 1            |
| IBD <sup>b</sup>              | 2,166 (0.4%)                | 4,540 (1.8%)     | 6,706 (0.8%)     | 15           | 1,269 (0.3%)                | 4,252 (1.5%)     | 5,521 (0.8%)     | 16           |
| Kidney disease, chronic       | 1,802 (0.3%)                | 15,097 (5.9%)    | 16,899 (2.1%)    | 14           | 1,575 (0.4%)                | 19,805 (7.2%)    | 21,380 (3.2%)    | 13           |
| Liver disease, chronic        | 7,957 (1.5%)                | 19,778 (7.7%)    | 27,735 (3.5%)    | 11           | 4,018 (1.0%)                | 15,980 (5.8%)    | 19,998 (3.0%)    | 14           |
| Mood disorder                 | 120,874 (22.6%)             | 161,369 (63.0%)  | 282,243 (35.7%)  | 2            | 69,412 (18.1%)              | 153,019 (55.6%)  | 222,431 (33.8%)  | 2            |
| Osteoporosis                  | 23,854 (4.5%)               | 29,283 (11.4%)   | 53,137 (6.7%)    | 10           | 21,321 (5.6%)               | 36,150 (13.1%)   | 57,471 (8.7%)    | 9            |
| Stroke/TIA <sup>b</sup>       | 3,053 (0.6%)                | 14,508 (5.7%)    | 17,561 (2.2%)    | 13           | 2,816 (0.7%)                | 18,652 (6.8%)    | 21,468 (3.3%)    | 12           |
| Urinary incontinence          | 16,287 (3.0%)               | 38,751 (15.1%)   | 55,038 (7.0%)    | 9            | 12,071 (3.2%)               | 42,575 (15.5%)   | 54,646 (8.3%)    | 10           |

<sup>a</sup>Multimorbidity defined as 3 or more chronic conditions

<sup>b</sup> COPD-Chronic obstructive pulmonary disease; IBD-inflammatory bowel disease; TIA-Transient ischemic attack

NOTE: The top 3 rank is indicated in gray for overall and for each age group.

**Table S1 - Chronic Conditions by Multimorbidity Status (3+ Chronic Conditions) by Age Group (Column %) – Continued**

| Age Group                     | 70 to 74 years              |                  |                  |              | 75 to 79 years              |                  |                  |              |
|-------------------------------|-----------------------------|------------------|------------------|--------------|-----------------------------|------------------|------------------|--------------|
|                               | Multimorbidity <sup>a</sup> |                  | All              | Overall Rank | Multimorbidity <sup>a</sup> |                  | All              | Overall Rank |
|                               | No                          | Yes              |                  |              | No                          | Yes              |                  |              |
| <b>Total N (% population)</b> | <b>N=230,704</b>            | <b>N=248,530</b> | <b>N=479,234</b> |              | <b>N=140,973</b>            | <b>N=228,005</b> | <b>N=368,978</b> |              |
| <b>Chronic Condition</b>      |                             |                  |                  |              |                             |                  |                  |              |
| Arthritis                     | 34,566 (15.0%)              | 122,099 (49.1%)  | 156,665 (32.7%)  | 2            | 23,405 (16.6%)              | 118,558 (52.0%)  | 141,963 (38.5%)  | 2            |
| Asthma                        | 7,571 (3.3%)                | 53,107 (21.4%)   | 60,678 (12.7%)   | 8            | 3,908 (2.8%)                | 44,489 (19.5%)   | 48,397 (13.1%)   | 8            |
| Cancer                        | 26,317 (11.4%)              | 84,217 (33.9%)   | 110,534 (23.1%)  | 5            | 17,267 (12.2%)              | 82,871 (36.3%)   | 100,138 (27.1%)  | 5            |
| Congestive heart failure      | 1,433 (0.6%)                | 28,160 (11.3%)   | 29,593 (6.2%)    | 11           | 1,180 (0.8%)                | 33,603 (14.7%)   | 34,783 (9.4%)    | 11           |
| COPD <sup>b</sup>             | 14,186 (6.1%)               | 77,468 (31.2%)   | 91,654 (19.1%)   | 6            | 8,942 (6.3%)                | 73,122 (32.1%)   | 82,064 (22.2%)   | 7            |
| Cardiovascular disease        | 11,349 (4.9%)               | 79,391 (31.9%)   | 90,740 (18.9%)   | 7            | 7,752 (5.5%)                | 81,612 (35.8%)   | 89,364 (24.2%)   | 6            |
| Dementia                      | 1,528 (0.7%)                | 11,064 (4.5%)    | 12,592 (2.6%)    | 15           | 2,246 (1.6%)                | 20,110 (8.8%)    | 22,356 (6.1%)    | 14           |
| Diabetes                      | 32,153 (13.9%)              | 110,736 (44.6%)  | 142,889 (29.8%)  | 4            | 20,153 (14.3%)              | 100,251 (44.0%)  | 120,404 (32.6%)  | 4            |
| HIV                           | 54 (0.0%)                   | 222 (0.1%)       | 276 (0.1%)       | 17           | 19 (0.0%)                   | 106 (0.0%)       | 125 (0.0%)       | 17           |
| Hypertension                  | 111,481 (48.3%)             | 212,994 (85.7%)  | 324,475 (67.7%)  | 1            | 77,260 (54.8%)              | 202,242 (88.7%)  | 279,502 (75.8%)  | 1            |
| IBD <sup>b</sup>              | 634 (0.3%)                  | 3,049 (1.2%)     | 3,683 (0.8%)     | 16           | 290 (0.2%)                  | 2,461 (1.1%)     | 2,751 (0.7%)     | 16           |
| Kidney disease, chronic       | 1,240 (0.5%)                | 22,103 (8.9%)    | 23,343 (4.9%)    | 12           | 1,059 (0.8%)                | 25,540 (11.2%)   | 26,599 (7.2%)    | 12           |
| Liver disease, chronic        | 1,959 (0.8%)                | 12,342 (5.0%)    | 14,301 (3.0%)    | 14           | 964 (0.7%)                  | 9,459 (4.1%)     | 10,423 (2.8%)    | 15           |
| Mood disorder                 | 32,783 (14.2%)              | 121,939 (49.1%)  | 154,722 (32.3%)  | 3            | 16,781 (11.9%)              | 104,303 (45.7%)  | 121,084 (32.8%)  | 3            |
| Osteoporosis                  | 14,973 (6.5%)               | 37,682 (15.2%)   | 52,655 (11.0%)   | 9            | 9,776 (6.9%)                | 38,565 (16.9%)   | 48,341 (13.1%)   | 9            |
| Stroke/TIA <sup>b</sup>       | 2,223 (1.0%)                | 20,831 (8.4%)    | 23,054 (4.8%)    | 13           | 1,768 (1.3%)                | 24,140 (10.6%)   | 25,908 (7.0%)    | 13           |
| Urinary incontinence          | 7,319 (3.2%)                | 40,619 (16.3%)   | 47,938 (10.0%)   | 10           | 4,529 (3.2%)                | 38,858 (17.0%)   | 43,387 (11.8%)   | 10           |

<sup>a</sup>Multimorbidity defined as 3 or more chronic conditions

<sup>b</sup> COPD-Chronic obstructive pulmonary disease; IBD-inflammatory bowel disease; TIA-Transient ischemic attack

NOTE: The top 3 rank is indicated in gray for overall and for each age group.

**Table S1 - Chronic Conditions by Multimorbidity Status (3+ Chronic Conditions) by Age Group (Column %) – Continued**

| Age Group                     | 80+ years                   |                  |                  |              |
|-------------------------------|-----------------------------|------------------|------------------|--------------|
|                               | Multimorbidity <sup>a</sup> |                  |                  |              |
|                               | No                          | Yes              | All              | Overall Rank |
| <b>Total N (% population)</b> | <b>N=148,084</b>            | <b>N=410,099</b> | <b>N=558,183</b> |              |
| <b>Chronic Condition</b>      |                             |                  |                  |              |
| Arthritis                     | 26,385 (17.8%)              | 227,483 (55.5%)  | 253,868 (45.5%)  | 2            |
| Asthma                        | 3,288 (2.2%)                | 72,413 (17.7%)   | 75,701 (13.6%)   | 11           |
| Cancer                        | 17,890 (12.1%)              | 153,096 (37.3%)  | 170,986 (30.6%)  | 6            |
| Congestive heart failure      | 2,556 (1.7%)                | 97,833 (23.9%)   | 100,389 (18.0%)  | 9            |
| COPD <sup>b</sup>             | 9,117 (6.2%)                | 138,107 (33.7%)  | 147,224 (26.4%)  | 7            |
| Cardiovascular disease        | 8,676 (5.9%)                | 166,953 (40.7%)  | 175,629 (31.5%)  | 4            |
| Dementia                      | 8,782 (5.9%)                | 93,956 (22.9%)   | 102,738 (18.4%)  | 8            |
| Diabetes                      | 18,060 (12.2%)              | 153,836 (37.5%)  | 171,896 (30.8%)  | 5            |
| HIV                           | 7 (0.0%)                    | 122 (0.0%)       | 129 (0.0%)       | 17           |
| Hypertension                  | 91,991 (62.1%)              | 374,265 (91.3%)  | 466,256 (83.5%)  | 1            |
| IBD <sup>b</sup>              | 203 (0.1%)                  | 3,404 (0.8%)     | 3,607 (0.6%)     | 16           |
| Kidney disease, chronic       | 1,477 (1.0%)                | 57,529 (14.0%)   | 59,006 (10.6%)   | 14           |
| Liver disease, chronic        | 640 (0.4%)                  | 11,938 (2.9%)    | 12,578 (2.3%)    | 15           |
| Mood disorder                 | 15,378 (10.4%)              | 186,675 (45.5%)  | 202,053 (36.2%)  | 3            |
| Osteoporosis                  | 9,929 (6.7%)                | 78,757 (19.2%)   | 88,686 (15.9%)   | 10           |
| Stroke/TIA <sup>b</sup>       | 2,730 (1.8%)                | 63,671 (15.5%)   | 66,401 (11.9%)   | 13           |
| Urinary incontinence          | 3,992 (2.7%)                | 66,860 (16.3%)   | 70,852 (12.7%)   | 12           |

<sup>a</sup>Multimorbidity defined as 3 or more chronic conditions

<sup>b</sup> COPD-Chronic obstructive pulmonary disease; IBD-inflammatory bowel disease; TIA-Transient ischemic attack

NOTE: The top 3 rank is indicated in gray for overall and for each age group.
