# Supplementary material for: Multimorbidity and mortality in Ontario, Canada: A population-based retrospective cohort study
Source: PubMed Central journal article supplement — J Comorb. 2020 Aug 27;10:2235042X20950598. doi: 10.1177/2235042X20950598 (PMC7457707; doi:10.1177/2235042x20950598), 2020-08-27
Supplement: Multimorbidity_and_mortality_Table_S2.pdf [file Multimorbidity_and_mortality_Table_S2.pdf]

**Table S2 - Characteristics of Ontario Population by Multimorbidity Status (2+ Chronic Conditions)**

|                                                          | Multimorbidity (2+ Chronic Conditions) |                    | All                 |
|----------------------------------------------------------|----------------------------------------|--------------------|---------------------|
|                                                          | No                                     | Yes                |                     |
| <b>Total</b>                                             | <b>N=9,700,616</b>                     | <b>N=3,880,575</b> | <b>N=13,581,191</b> |
|                                                          | <b>71.4%</b>                           | <b>28.6%</b>       | <b>100.0%</b>       |
| Age (mean (SD))                                          | 31.79 (19.42)                          | 59.24 (17.79)      | 39.64 (22.66)       |
| Sex (male)                                               | 4,953,614 (51.1%)                      | 1,710,496 (44.1%)  | 6,664,110 (49.1%)   |
| Material deprivation <sup>a</sup><br>/Rural (N and row%) |                                        |                    |                     |
| 1-least deprived                                         | 2,296,707 (74.8%)                      | 774,242 (25.2%)    | 3,070,949 (100%)    |
| 2                                                        | 1,722,600 (72.0%)                      | 670,309 (28.0%)    | 2,392,909 (100%)    |
| 3                                                        | 1,547,316 (71.0%)                      | 631,766 (29.0%)    | 2,179,082 (100%)    |
| 4                                                        | 1,415,521 (69.8%)                      | 611,944 (30.2%)    | 2,027,465 (100%)    |
| 5-most deprived                                          | 1,586,114 (69.8%)                      | 687,196 (30.2%)    | 2,273,310 (100%)    |
| Rural                                                    | 1,004,036 (68.8%)                      | 455,292 (31.2%)    | 1,459,328 (100%)    |
| Missing                                                  | 128,322 (72.0%)                        | 49,826 (28.0%)     | 178,148 (100%)      |

<sup>a</sup> Place of residence is broken down by material deprivation for urban residents but not for rural residents. The material deprivation index is valid only within urban populations.<sup>29</sup>
