# Supplementary material for: Multimorbidity and mortality in Ontario, Canada: A population-based retrospective cohort study
Source: PubMed Central journal article supplement — J Comorb. 2020 Aug 27;10:2235042X20950598. doi: 10.1177/2235042X20950598 (PMC7457707; doi:10.1177/2235042x20950598), 2020-08-27
Supplement: Multimorbidity_and_mortality_Table_S3.pdf [file Multimorbidity_and_mortality_Table_S3.pdf]

**Table S3 - Distribution of Multimorbidity (2+ Chronic Conditions) in Ontario by Chronic Conditions (row %)**

|                           | Multimorbidity (2+ Chronic Conditions) |                                | Total                           |
|---------------------------|----------------------------------------|--------------------------------|---------------------------------|
|                           | No                                     | Yes                            |                                 |
|                           | <b>N=9,700,616<sup>a</sup></b>         | <b>N=3,880,575<sup>a</sup></b> | <b>N=13,581,191<sup>a</sup></b> |
| <b>Chronic Conditions</b> |                                        |                                |                                 |
| Arthritis                 | 143,554 (10.6%)                        | 1,212,403 (89.4%)              | 1,355,957 (100%)                |
| Asthma                    | 990,365 (48.4%)                        | 1,055,234 (51.6%)              | 2,045,599 (100%)                |
| Cancer                    | 126,803 (14.0%)                        | 776,552 (86.0%)                | 903,355 (100%)                  |
| Congestive heart failure  | 2,403 (1.0%)                           | 235,301 (99.0%)                | 237,704 (100%)                  |
| COPD <sup>b</sup>         | 73,988 (9.0%)                          | 745,003 (91.0%)                | 818,991 (100%)                  |
| Cardiovascular disease    | 36,568 (5.2%)                          | 665,290 (94.8%)                | 701,858 (100%)                  |
| Dementia                  | 3,454 (2.2%)                           | 150,361 (97.8%)                | 153,815 (100%)                  |
| Diabetes                  | 157,861 (12.4%)                        | 1,111,407 (87.6%)              | 1,269,268 (100%)                |
| HIV                       | 4,658 (27.1%)                          | 12,526 (72.9%)                 | 17,184 (100%)                   |
| Hypertension              | 511,548 (17.9%)                        | 2,349,104 (82.1%)              | 2,860,652 (100%)                |
| IBD <sup>b</sup>          | 19,617 (24.2%)                         | 61,606 (75.8%)                 | 81,223 (100%)                   |
| Kidney disease, chronic   | 5,203 (2.7%)                           | 190,211 (97.3%)                | 195,414 (100%)                  |
| Liver disease, chronic    | 65,315 (23.5%)                         | 213,159 (76.5%)                | 278,474 (100%)                  |
| Mood disorder             | 1,434,729 (39.2%)                      | 2,222,959 (60.8%)              | 3,657,688 (100%)                |
| Osteoporosis              | 41,575 (11.2%)                         | 330,599 (88.8%)                | 372,174 (100%)                  |
| Stroke/ TIA <sup>b</sup>  | 8,539 (4.3%)                           | 190,976 (95.7%)                | 199,515 (100%)                  |
| Urinary incontinence      | 104,375 (17.5%)                        | 492,543 (82.5%)                | 596,918 (100%)                  |

<sup>a</sup>The numbers in these columns do not add to these total numbers because people can have more than one chronic conditions, and therefore, are counted more than once.

<sup>b</sup>COPD-Chronic obstructive pulmonary disease; IBD-inflammatory bowel disease; TIA-Transient ischemic attack
