# Supplementary material for: Multimorbidity and mortality in Ontario, Canada: A population-based retrospective cohort study
Source: PubMed Central journal article supplement — J Comorb. 2020 Aug 27;10:2235042X20950598. doi: 10.1177/2235042X20950598 (PMC7457707; doi:10.1177/2235042x20950598), 2020-08-27
Supplement: Multimorbidity_and_mortality_Table_S4.pdf [file Multimorbidity_and_mortality_Table_S4.pdf]

**Table S4 –Unadjusted and Adjusted Mortality Rate Ratios by Multimorbidity Status (2+ Chronic Conditions) by Material Deprivation Quintile/Rural (N = 13,403,043)**

**MALES (N = 6,574,534)**

| <b>Mortality</b>                        |                                               |                         |                          |             |                              |                                  |
|-----------------------------------------|-----------------------------------------------|-------------------------|--------------------------|-------------|------------------------------|----------------------------------|
|                                         | <b># Deaths within 1 year/Population</b>      |                         | <b>Unadjusted rate %</b> |             | <b>Unadjusted Rate Ratio</b> | <b>Adjusted Rate Ratio</b>       |
|                                         | <b>Multimorbidity (2+ Chronic Conditions)</b> |                         | <b>Multimorbidity</b>    |             |                              |                                  |
| <b>Material deprivation<sup>a</sup></b> | <b>No</b>                                     | <b>Yes</b>              | <b>No</b>                | <b>Yes</b>  | <b>Rate (95% CI)</b>         | <b>Rate (95% CI)<sup>b</sup></b> |
| 1-least deprived                        | 1,243/1,155,855                               | 6,560/342,941           | 0.11                     | 1.91        | 17.79 (16.74 - 18.90)        | 2.55 (2.38 - 2.72)               |
| 2                                       | 1,205/875,493                                 | 6,056/297,704           | 0.14                     | 2.03        | 14.78 (13.89 - 15.72)        | 2.33 (2.17 - 2.49)               |
| 3                                       | 1,122/789,854                                 | 6,143/278,554           | 0.14                     | 2.21        | 15.52 (14.57 - 16.54)        | 2.55 (2.38 - 2.74)               |
| 4                                       | 1,150/726,407                                 | 6,326/267,110           | 0.16                     | 2.37        | 14.96 (14.05 - 15.93)        | 2.47 (2.31 - 2.65)               |
| 5 - most deprived                       | 1,534/815,153                                 | 7,276/292,840           | 0.19                     | 2.48        | 13.20 (12.50 - 13.95)        | 2.34 (2.20 - 2.49)               |
| Rural                                   | 1,209/524,092                                 | 5,588/208,531           | 0.23                     | 2.68        | 11.62 (10.92 - 12.36)        | 2.33 (2.18 - 2.50)               |
| <b>TOTAL</b>                            | <b>7,463/4,886,854</b>                        | <b>37,949/1,687,680</b> | <b>0.15</b>              | <b>2.25</b> | <b>14.72 (14.36 - 15.09)</b> | <b>2.45 (2.39 - 2.52)</b>        |

<sup>a</sup> Place of residence is broken down by material deprivation for urban residents but not for rural residents. The material deprivation index is valid only within urban populations.<sup>29</sup>

<sup>b</sup> Adjusted for age, LHIN

**FEMALES (N = 6,828,509)**

| <b>Mortality</b>                        |                                               |                  |                          |            |                              |                                  |
|-----------------------------------------|-----------------------------------------------|------------------|--------------------------|------------|------------------------------|----------------------------------|
|                                         | <b># Deaths within 1 year/Population</b>      |                  | <b>Unadjusted rate %</b> |            | <b>Unadjusted Rate Ratio</b> | <b>Adjusted Rate Ratio</b>       |
|                                         | <b>Multimorbidity (2+ Chronic Conditions)</b> |                  | <b>Multimorbidity</b>    |            |                              |                                  |
| <b>Material deprivation<sup>a</sup></b> | <b>No</b>                                     | <b>Yes</b>       | <b>No</b>                | <b>Yes</b> | <b>Rate (95% CI)</b>         | <b>Rate (95% CI)<sup>b</sup></b> |
| 1-least deprived                        | 962/1,140,852                                 | 7,489/431,301    | 0.08                     | 1.74       | 20.59 (19.26 - 22.02)        | 2.38 (2.21 - 2.56)               |
| 2                                       | 823/847,107                                   | 6,589/372,605    | 0.10                     | 1.77       | 18.20 (16.93 - 19.57)        | 2.39 (2.21 - 2.58)               |
| 3                                       | 740/757,462                                   | 6,545/353,212    | 0.10                     | 1.85       | 18.97 (17.58 - 20.47)        | 2.62 (2.41 - 2.84)               |
| 4                                       | 871/689,114                                   | 6,879/344,834    | 0.13                     | 1.99       | 15.78 (14.71 - 16.94)        | 2.28 (2.12 - 2.46)               |
| 5 - most deprived                       | 1,028/770,961                                 | 8,734/394,356    | 0.13                     | 2.21       | 16.61 (15.57 - 17.72)        | 2.46 (2.29 - 2.64)               |
| Rural                                   | 808/479,944                                   | 5,846/246,761    | 0.17                     | 2.37       | 14.07 (13.07 - 15.15)        | 2.45 (2.26 - 2.64)               |
| TOTAL                                   | 5,232/4,684,440                               | 42,082/2,143,069 | 0.11                     | 1.96       | 17.59 (17.09 - 18.10)        | 2.46 (2.39 - 2.54)               |

<sup>a</sup> Place of residence is broken down by material deprivation for urban residents but not for rural residents. The material deprivation index is valid only within urban populations.<sup>29</sup>

<sup>b</sup> Adjusted for age, LHIN
