# Supplementary material for: Multimorbidity and mortality in Ontario, Canada: A population-based retrospective cohort study
Source: PubMed Central journal article supplement — J Comorb. 2020 Aug 27;10:2235042X20950598. doi: 10.1177/2235042X20950598 (PMC7457707; doi:10.1177/2235042x20950598), 2020-08-27
Supplement: Multimorbidity_and_mortality_Table_S5.pdf [file Multimorbidity_and_mortality_Table_S5.pdf]

**Table S5 –Unadjusted and Adjusted Mortality Rate Ratios by Multimorbidity Status (2+ Chronic Conditions) by Age (N = 13,581,191)**

**MALES (N = 6,664,110)**

| Mortality   |                                        |                  |                   |      |                       |                            |
|-------------|----------------------------------------|------------------|-------------------|------|-----------------------|----------------------------|
|             | # Deaths within 1 year/Population      |                  | Unadjusted rate % |      | Unadjusted Rate Ratio | Adjusted Rate Ratio        |
|             | Multimorbidity (2+ Chronic Conditions) |                  | Multimorbidity    |      |                       |                            |
| Age         | No MM                                  | MM               | No MM             | MM   | Rate (95% CI)         | Rate (95% CI) <sup>a</sup> |
| 0-17 years  | 174/1,382,411                          | 30/36,753        | 0.01              | 0.08 | 6.49 (4.40 - 9.55)    | 6.41 (4.32 - 9.51)         |
| 18-24 years | 246/584,043                            | 76/55,019        | 0.04              | 0.14 | 3.28 (2.54 - 4.24)    | 3.33 (2.57 - 4.31)         |
| 25-29 years | 174/407,489                            | 62/40,646        | 0.04              | 0.15 | 3.57 (2.67 - 4.77)    | 3.50 (2.60 - 4.71)         |
| 30-34 years | 187/392,542                            | 106/41,757       | 0.05              | 0.25 | 5.33 (4.20 - 6.76)    | 5.30 (4.16 - 6.75)         |
| 35-39 years | 238/377,979                            | 139/54,078       | 0.06              | 0.26 | 4.08 (3.31 - 5.03)    | 4.01 (3.23 - 4.97)         |
| 40-44 years | 362/387,910                            | 277/82,789       | 0.09              | 0.33 | 3.59 (3.07 - 4.19)    | 3.50 (2.99 - 4.10)         |
| 45-49 years | 479/388,799                            | 585/125,957      | 0.12              | 0.46 | 3.77 (3.34 - 4.25)    | 3.64 (3.22 - 4.11)         |
| 50-54 years | 783/359,570                            | 1,117/173,164    | 0.22              | 0.65 | 2.96 (2.70 - 3.25)    | 2.90 (2.65 - 3.18)         |
| 55-59 years | 908/264,964                            | 1,797/196,339    | 0.34              | 0.92 | 2.67 (2.47 - 2.89)    | 2.60 (2.39 - 2.81)         |
| 60-64 years | 941/178,226                            | 2,687/205,396    | 0.53              | 1.31 | 2.48 (2.30 - 2.67)    | 2.40 (2.23 - 2.59)         |
| 65-69 years | 868/114,050                            | 3,521/204,234    | 0.76              | 1.72 | 2.27 (2.10 - 2.44)    | 2.24 (2.08 - 2.42)         |
| 70-74 years | 651/59,748                             | 4,450/166,712    | 1.09              | 2.67 | 2.45 (2.26 - 2.66)    | 2.42 (2.23 - 2.63)         |
| 75-79 years | 563/31,636                             | 5,686/137,287    | 1.78              | 4.14 | 2.33 (2.13 - 2.54)    | 2.31 (2.12 - 2.52)         |
| 80+ years   | 1,041/24,247                           | 18,125/190,365   | 4.29              | 9.52 | 2.22 (2.08 - 2.36)    | 2.22 (2.08 - 2.36)         |
| TOTAL       | 7,615/4,953,614                        | 38,658/1,710,496 | 0.15              | 2.26 | 14.70 (14.34 - 15.07) | 14.44 (14.09 - 14.81)      |

<sup>a</sup> Adjusted for LHIN, Urban material deprivation and rural

**FEMALES (N = 6,917,081)**

| <b>Mortality</b> |                                               |                         |                          |             |                              |                                  |
|------------------|-----------------------------------------------|-------------------------|--------------------------|-------------|------------------------------|----------------------------------|
|                  | <b># Deaths within 1 year/Population</b>      |                         | <b>Unadjusted rate %</b> |             | <b>Unadjusted Rate Ratio</b> | <b>Adjusted Rate Ratio</b>       |
|                  | <b>Multimorbidity (2+ Chronic Conditions)</b> |                         | <b>Multimorbidity</b>    |             |                              |                                  |
| <b>Age</b>       | <b>No MM</b>                                  | <b>MM</b>               | <b>No MM</b>             | <b>MM</b>   | <b>Rate (95% CI)</b>         | <b>Rate (95% CI)<sup>a</sup></b> |
| 0-17 years       | 106/1,319,277                                 | 29/28,016               | 0.01                     | 0.10        | 12.88 (8.54 - 19.43)         | 13.37 (8.85 - 20.20)             |
| 18-24 years      | 112/550,718                                   | 51/62,468               | 0.02                     | 0.08        | 4.01 (2.88 - 5.59)           | 3.87 (2.76 - 5.43)               |
| 25-29 years      | 96/396,733                                    | 72/59,573               | 0.02                     | 0.12        | 4.99 (3.68 - 6.78)           | 4.84 (3.55 - 6.59)               |
| 30-34 years      | 114/392,619                                   | 88/70,210               | 0.03                     | 0.13        | 4.32 (3.27 - 5.70)           | 4.31 (3.24 - 5.72)               |
| 35-39 years      | 125/372,821                                   | 166/88,334              | 0.03                     | 0.19        | 5.60 (4.44 - 7.07)           | 5.60 (4.42 - 7.10)               |
| 40-44 years      | 202/371,469                                   | 263/116,753             | 0.05                     | 0.23        | 4.14 (3.45 - 4.98)           | 3.99 (3.31 - 4.81)               |
| 45-49 years      | 343/364,324                                   | 529/160,238             | 0.09                     | 0.33        | 3.51 (3.06 - 4.02)           | 3.34 (2.91 - 3.84)               |
| 50-54 years      | 440/329,844                                   | 954/211,480             | 0.13                     | 0.45        | 3.38 (3.02 - 3.79)           | 3.22 (2.87 - 3.61)               |
| 55-59 years      | 484/241,831                                   | 1,481/236,325           | 0.20                     | 0.63        | 3.13 (2.83 - 3.47)           | 3.06 (2.75 - 3.39)               |
| 60-64 years      | 465/166,431                                   | 2,047/241,101           | 0.28                     | 0.85        | 3.04 (2.75 - 3.36)           | 2.98 (2.69 - 3.30)               |
| 65-69 years      | 482/108,886                                   | 2,795/231,230           | 0.44                     | 1.21        | 2.73 (2.48 - 3.01)           | 2.68 (2.43 - 2.96)               |
| 70-74 years      | 456/61,282                                    | 3,552/191,492           | 0.74                     | 1.85        | 2.49 (2.26 - 2.75)           | 2.46 (2.23 - 2.72)               |
| 75-79 years      | 441/34,411                                    | 4,930/165,644           | 1.28                     | 2.98        | 2.32 (2.11 - 2.56)           | 2.31 (2.09 - 2.55)               |
| 80+ years        | 1,471/36,356                                  | 25,982/307,215          | 4.05                     | 8.46        | 2.09 (1.98 - 2.20)           | 2.10 (1.99 - 2.21)               |
| <b>TOTAL</b>     | <b>5,337/4,747,002</b>                        | <b>42,939/2,170,079</b> | <b>0.11</b>              | <b>1.98</b> | <b>17.6 (17.11 - 18.11)</b>  | <b>17.16 (16.67 - 17.66)</b>     |

<sup>a</sup> Adjusted for LHIN, Urban material deprivation and rural
